# Supplementary material
Source: Elsevier journal article supplement (https://www.sciencedirect.com/science/article/pii/S0210570522001431)
Supplement: mmc1 [file S0210570522001431:mmc1.doc]

Supplementary material 1:

The MOS-SSS [22]

Next are some questions about the support that is available to you.

1- About how many close friends and close relatives do you have (people you feel at ease with and can talk to about what is on your mind)?

Write the number of close friends and close relatives:

People sometimes look to others for companionship, assistance, or other types of support. How often is each of the following kinds of support available to you if you need it? Choose one number from each line.

|  | None of the time | A little of the time | Some of the time | Most of the time | All of the time |
| --- | --- | --- | --- | --- | --- |
| 1. Someone to help you if you were confined to bed | 1 | 2 | 3 | 4 | 5 |
| 2. Someone you can count on to listen to you when you need to talk | 1 | 2 | 3 | 4 | 5 |
| 3. Someone to give you good advice about a  crisis | 1 | 2 | 3 | 4 | 5 |
| 4. Someone to take you to the doctor if you needed it | 1 | 2 | 3 | 4 | 5 |
| 5. Someone who shows you love and  affection | 1 | 2 | 3 | 4 | 5 |
| 6. Someone to have a good time with | 1 | 2 | 3 | 4 | 5 |
| 7. Someone to give you information to help you understand a situation | 1 | 2 | 3 | 4 | 5 |
| 8. Someone to confide in or talk to about yourself or your problems | 1 | 2 | 3 | 4 | 5 |
| 9. Someone who hugs you | 1 | 2 | 3 | 4 | 5 |
| 10. Someone to get together with for relaxation | 1 | 2 | 3 | 4 | 5 |
| 11. Someone to prepare your meals if you were unable to do it yourself | 1 | 2 | 3 | 4 | 5 |
| 12. Someone whose advice you really want | 1 | 2 | 3 | 4 | 5 |
| 13. Someone to do things with to help you get your mind off things | 1 | 2 | 3 | 4 | 5 |
| 14. Someone to help with daily chores if you were sick | 1 | 2 | 3 | 4 | 5 |
| 15. Someone to share your most private worries and fears with | 1 | 2 | 3 | 4 | 5 |
| 16. Someone to turn to for suggestions about how to deal with a personal problem | 1 | 2 | 3 | 4 | 5 |
| 17. Someone to do something enjoyable with | 1 | 2 | 3 | 4 | 5 |
| 18. Someone who understands your problems | 1 | 2 | 3 | 4 | 5 |
| 19. Someone to love and make you feel wanted | 1 | 2 | 3 | 4 | 5 |

Supplementary material 2:

The validated Spanish version of MOS-SSS [23]

Las siguientes preguntas se refieren al apoyo o ayuda de que Vd. Dispone:

1. Aproximadamente, ¿Cuántos amigos íntimos o familiares cercanos tiene VD? (Personas con las que se encuentra a gusto y puede hablar de todo lo que se le ocurre)

Escriba el nº de amigos íntimos y familiares cercanos

La gente busca a otras personas para encontrar compañía, asistencia u otros tipos de ayuda ¿Con qué frecuencia Vd. dispone de cada uno de los siguientes tipos de apoyo cuando lo necesita? (Marque un círculo uno de los números de cada fila)

| CUESTIONES: ¿Cuenta con ALGUIEN? | NUNCA | POCAS VCES | ALGUNAS VECES | LA MAYORIA DE LAS VECES | SIEMPRE |
| --- | --- | --- | --- | --- | --- |
| 1. Que le ayude cuando tenga que estar en la cama | 1 | 2 | 3 | 4 | 5 |
| 1. Con quien pueda contar cuando necesite hablar | 1 | 2 | 3 | 4 | 5 |
| 1. Que le aconseje cuando tenga problemas | 1 | 2 | 3 | 4 | 5 |
| 1. Que le lleve al médico cuando lo necesite | 1 | 2 | 3 | 4 | 5 |
| 1. Que le muestre amor y afecto | 1 | 2 | 3 | 4 | 5 |
| 1. Con quien pasar un buen rato | 1 | 2 | 3 | 4 | 5 |
| 1. Que le informe y ayude a entender la situación |  | 2 | 3 | 4 | 5 |
| 1. En quien confiar o con quien hablar de sí mismo y sus preocupaciones | 1 | 2 | 3 | 4 | 5 |
| 1. Que le abrace | 1 | 2 | 3 | 4 | 5 |
| 1. Con quien pueda relajarse | 1 | 2 | 3 | 4 | 5 |
| 1. Que le prepare la comida si no puede hacerlo | 1 | 2 | 3 | 4 | 5 |
| 1. Cuyo consejo realmente desee | 1 | 2 | 3 | 4 | 5 |
| 1. Con quien hacer cosas que le sirvan para olvidar sus problemas | 1 | 2 | 3 | 4 | 5 |
| 1. Que le ayuda en sus tareas domésticas si está enfermo | 1 | 2 | 3 | 4 | 5 |
| 1. Alguien con quien compartir sus temores y problemas más íntimos | 1 | 2 | 3 | 4 | 5 |
| 1. Que le aconseje cómo resolver sus problemas personales | 1 | 2 | 3 | 4 | 5 |
| 1. Con quién divertirse | 1 | 2 | 3 | 4 | 5 |
| 1. Que comprenda sus problemas | 1 | 2 | 3 | 4 | 5 |
| 1. A quien amar y hacerle sentir querido | 1 | 2 | 3 | 4 | 5 |

| ***Resultado****:* (suma de los valores correspondientes) | |
| --- | --- |
| Índice global de apoyo social | Todas las respuestas |
| Apoyo emocional | Respuestas núm.: 3, 4, 8, 9, 13, 16, 17 y 19 |
| Ayuda material | Respuestas a las preguntas: 2, 5, 12 y 15 |
| Relaciones sociales de ocio y distracción | Respuestas a las preguntas: 7, 11, 14 y 18 |
| Apoyo afectivo | Respuestas a las preguntas 6, 10 y 20 |

| ***Interpretación*** | Máximo | Medio | Mínimo |
| --- | --- | --- | --- |
| Índice global de apoyo social | 94 | 57 | 19 |
| Apoyo emocional | 40 | 24 | 8 |
| Ayuda material | 20 | 12 | 4 |
| Relaciones sociales de ocio y distracción | 20 | 12 | 4 |
| Apoyo afectivo | 15 | 9 | 3 |
